# Supplementary figures and images for: DLL3 regulates the migration and invasion of small cell lung cancer by modulating Snail
Source: PubMed Central journal article supplement — Cancer Sci. 2019 Apr 13;110(5):1599–608. doi: 10.1111/cas.13997 (PMC6501010; doi:10.1111/cas.13997), 2019-04-13

**Figure S1. Representative images of migrating and invading cells transfected with *DLL3*-siRNA.**

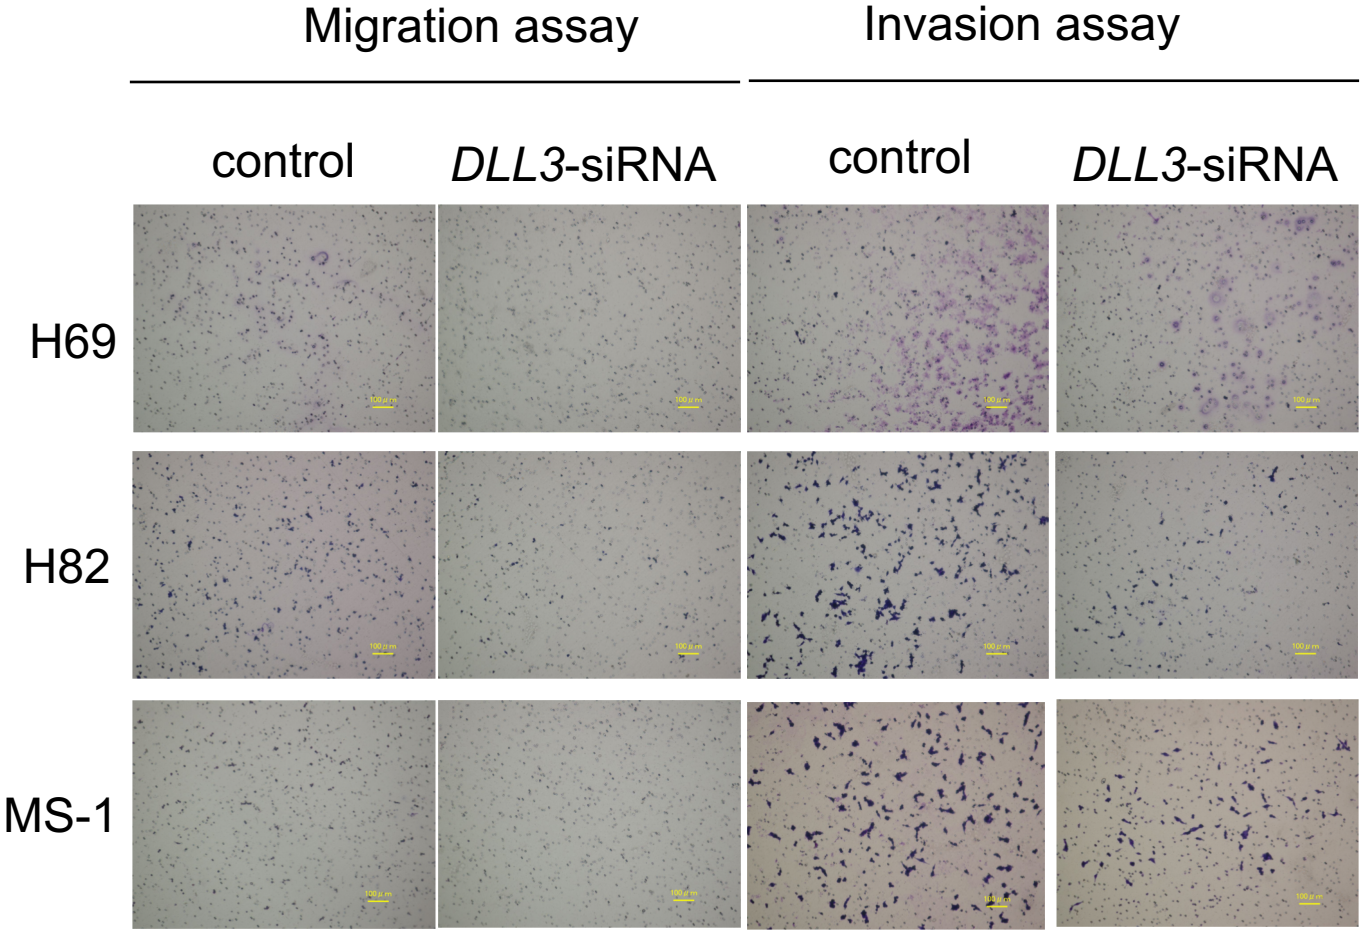

Supplement: CAS-110-1599-s001.pdf [file CAS-110-1599-s001.pdf]

**Figure S2. Representative images of migrating and invading H82 cells transfected with *SNAI1*-siRNA.**

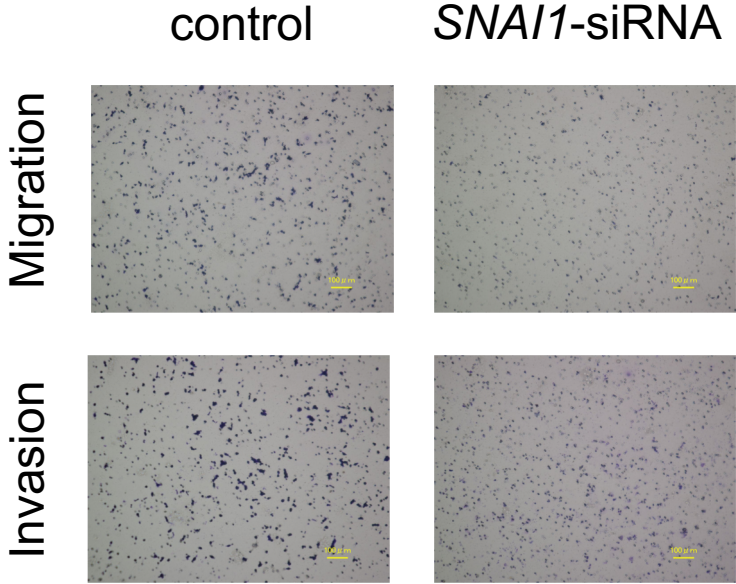

Supplement: CAS-110-1599-s002.pdf [file CAS-110-1599-s002.pdf]

**Figure S3. Effect of NOTCH1 downregulation in H82 cells.**

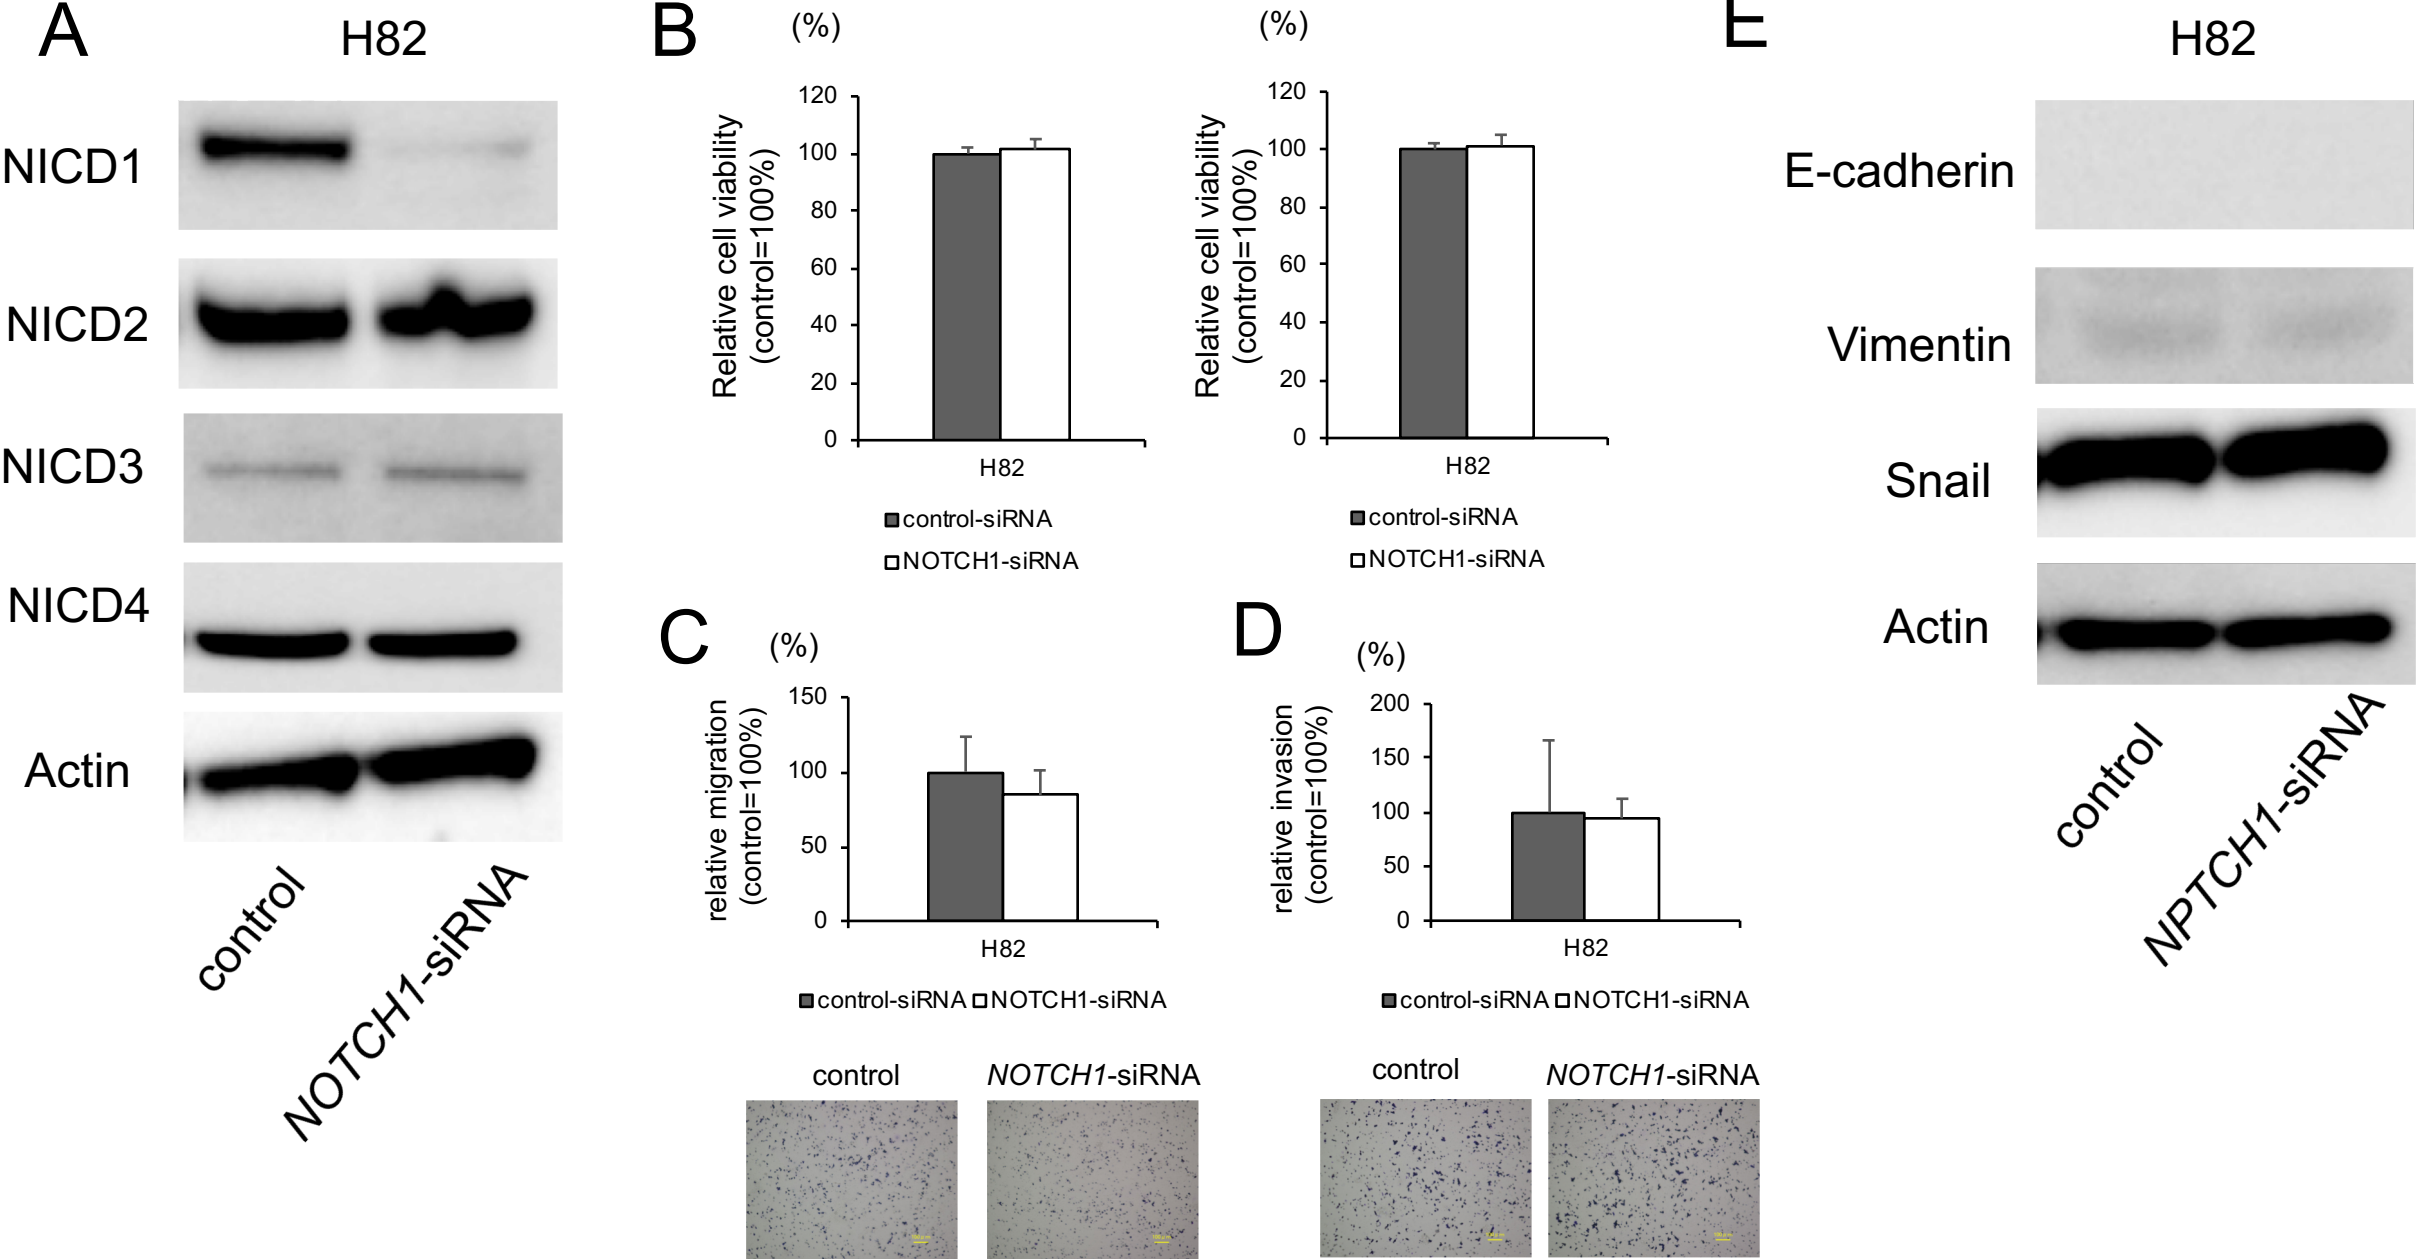

Supplement: CAS-110-1599-s003.pdf [file CAS-110-1599-s003.pdf]
